# Supplementary material for: Dyslipidemia versus obesity as predictors of ischemic stroke prognosis: a multi-center study in China
Source: PubMed Central journal article supplement (PMC10924996; doi:10.1186/s12944-024-02061-9), 2024-03-09
Supplement: 12944_2024_2061_MOESM2_ESM.pdf [file 12944_2024_2061_MOESM2_ESM.pdf]

## Propensity Score Matching

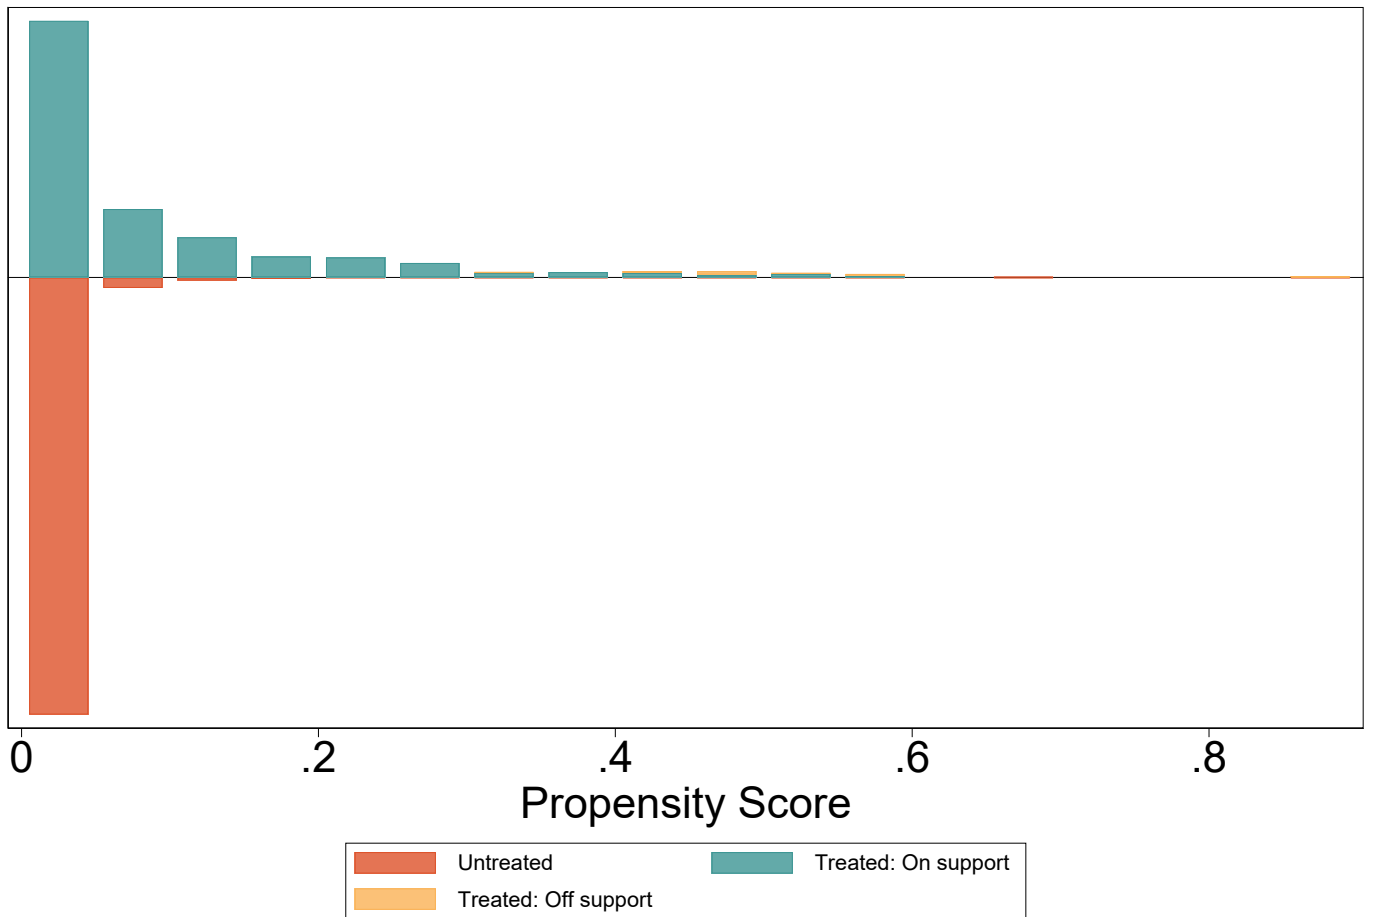

## Propensity Score Matching

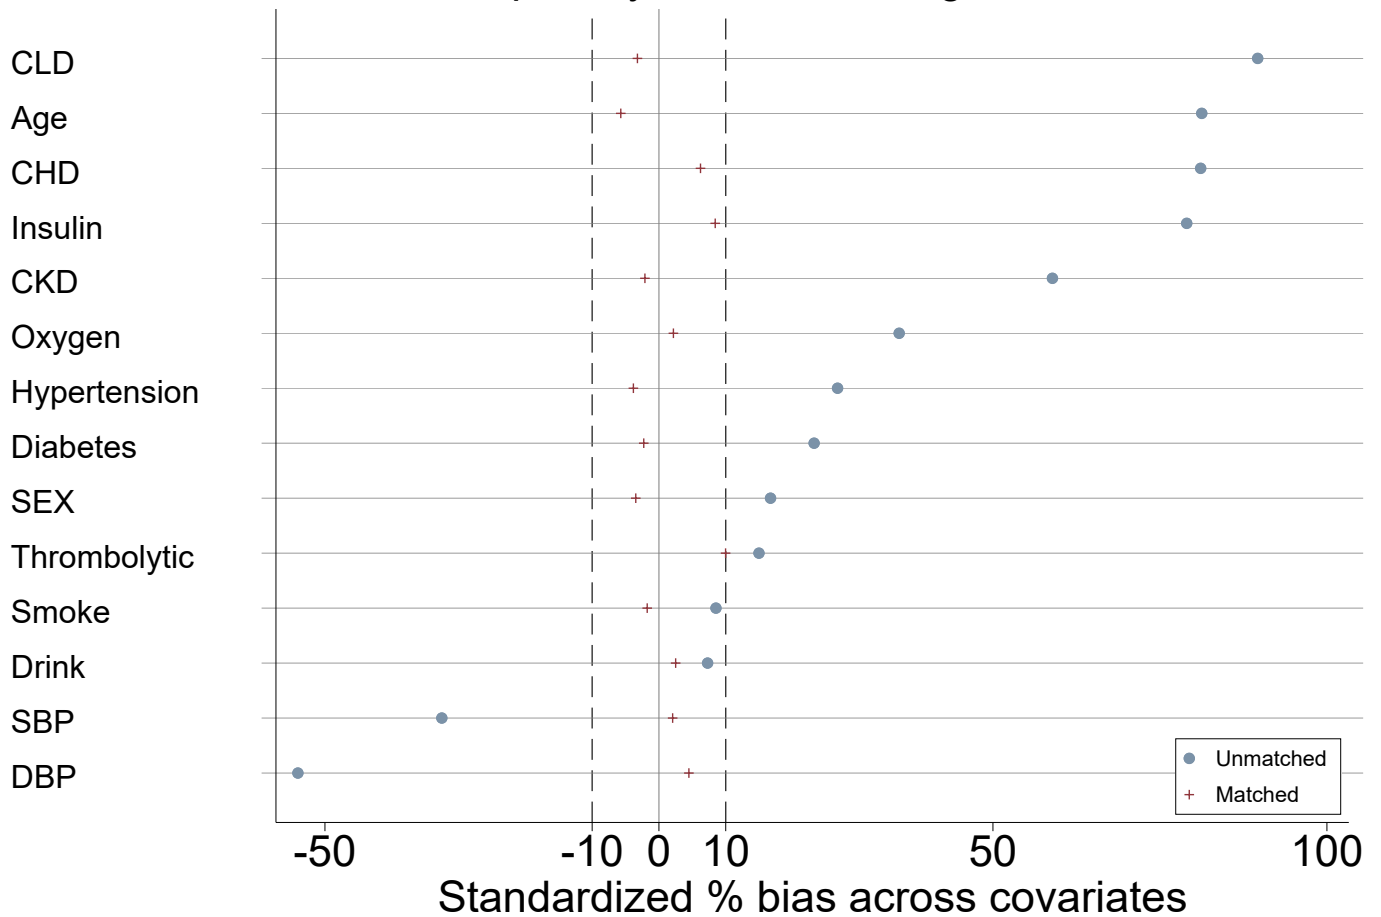

Supplementary figure 2 Changes in variables before and after performing propensity matching.
