# Supplementary material for: Dyslipidemia versus obesity as predictors of ischemic stroke prognosis: a multi-center study in China
Source: PubMed Central journal article supplement (PMC10924996; doi:10.1186/s12944-024-02061-9), 2024-03-09
Supplement: 12944_2024_2061_MOESM5_ESM.pdf [file 12944_2024_2061_MOESM5_ESM.pdf]

### Three-year clinical outcome

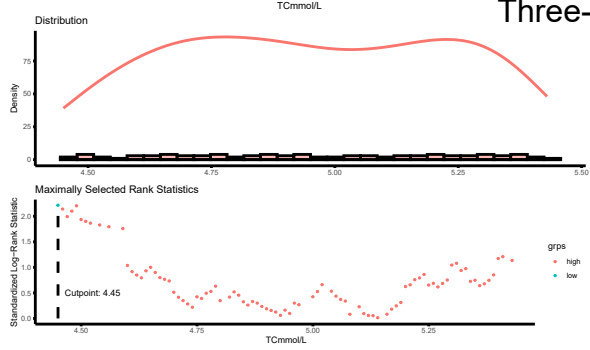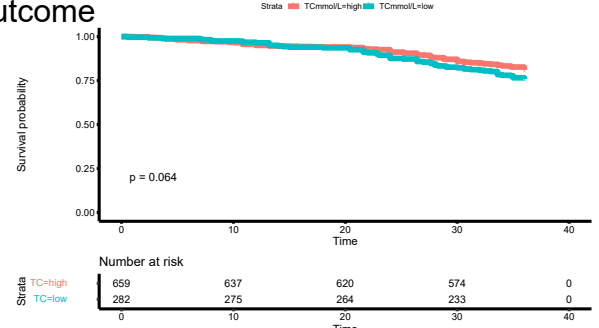

### Three-year clinical outcome

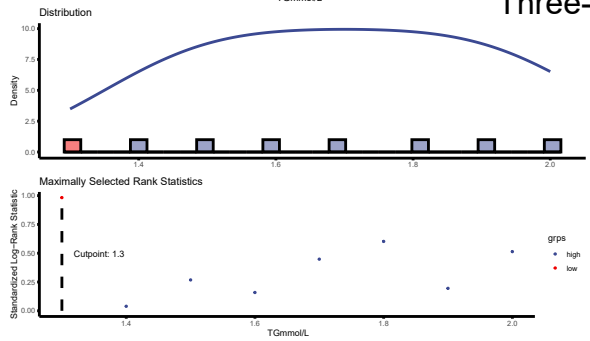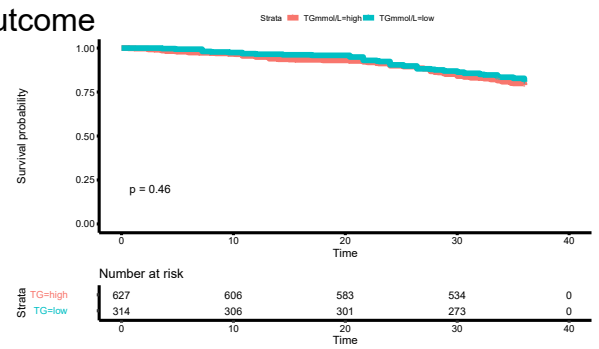

### Four-year clinical outcome

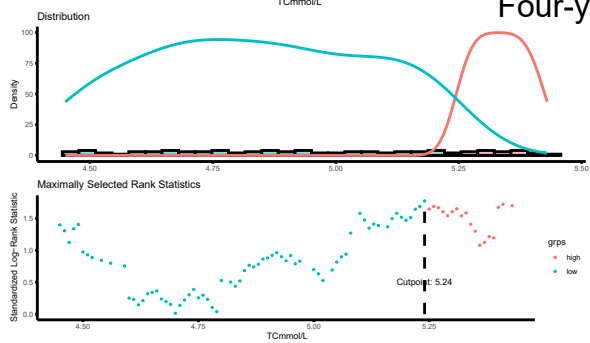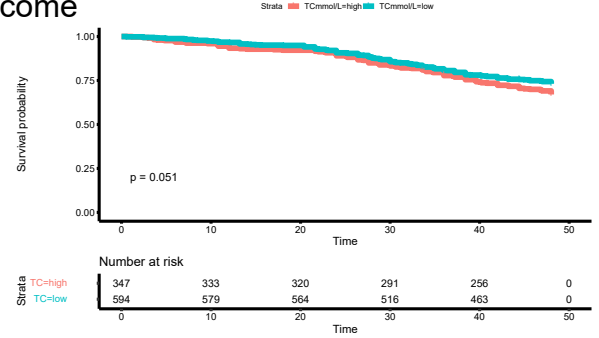

### Four-year clinical outcome

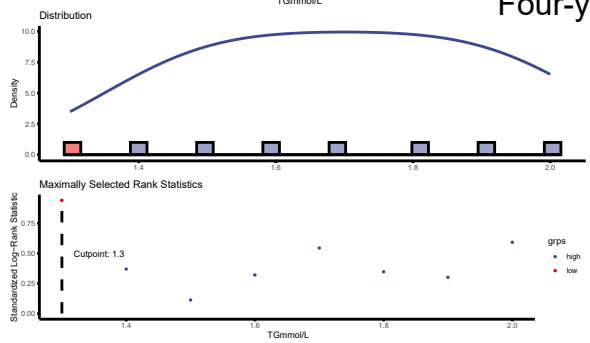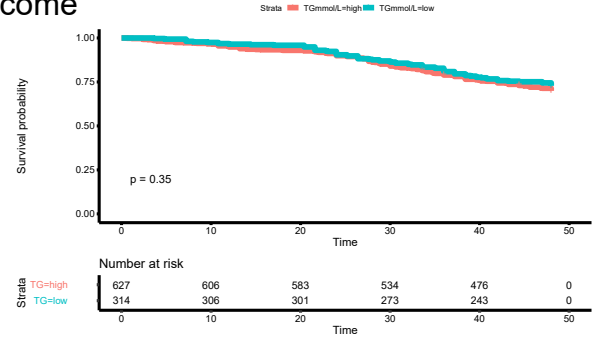

### Five-year clinical outcome

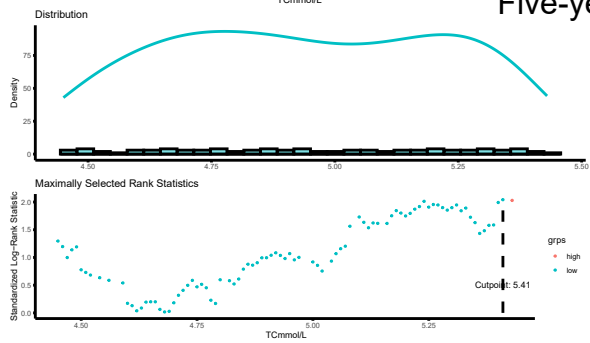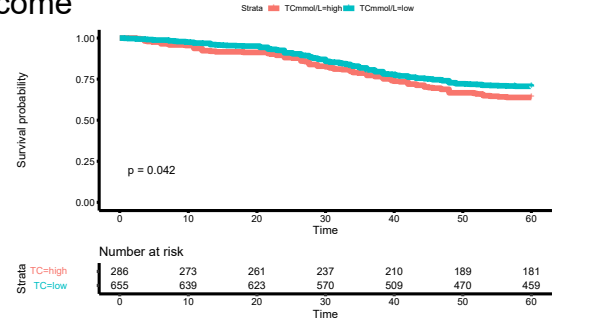

### Five-year clinical outcome

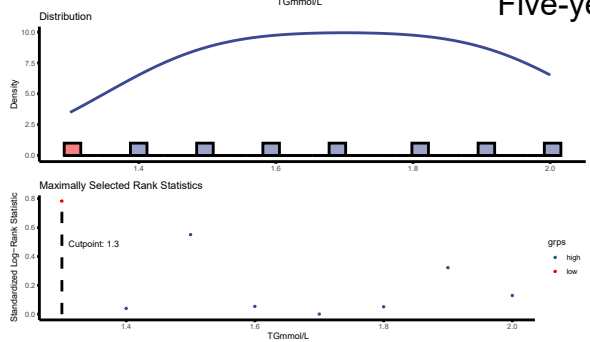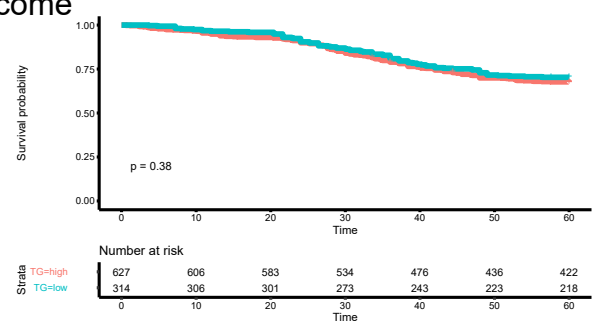

Supplementary figure 5: KM survival curves of the Ischemic Stroke patients.
